# Supplementary material
Source: PubMed Central journal article supplement (PMC7802005)

## Supplemental Online Content

Gabbard J, Pajewski NM, Callahan KE, et al. Effectiveness of a nurse-led multidisciplinary intervention vs usual care on advance care planning for vulnerable older adults in an accountable care organization: a randomized clinical trial. *JAMA Intern Med*. Published online January 11, 2021. doi:10.1001/jamainternmed.2020.5950

**eFigure.** Incidence of Emergency Department Visits and Inpatient Hospitalizations within the Nurse Navigator Group Stratified by Whether the Patient Did or Did Not Complete Either a Telephone or In-Person Advanced Care Planning Visit

This supplemental material has been provided by the authors to give readers additional information about their work.

**eFigure**

Incidence of Emergency Department Visits and Inpatient Hospitalizations within the Nurse Navigator Group Stratified by Whether the Patient Did or Did Not Complete Either a Telephone or In-Person Advanced Care Planning Visit

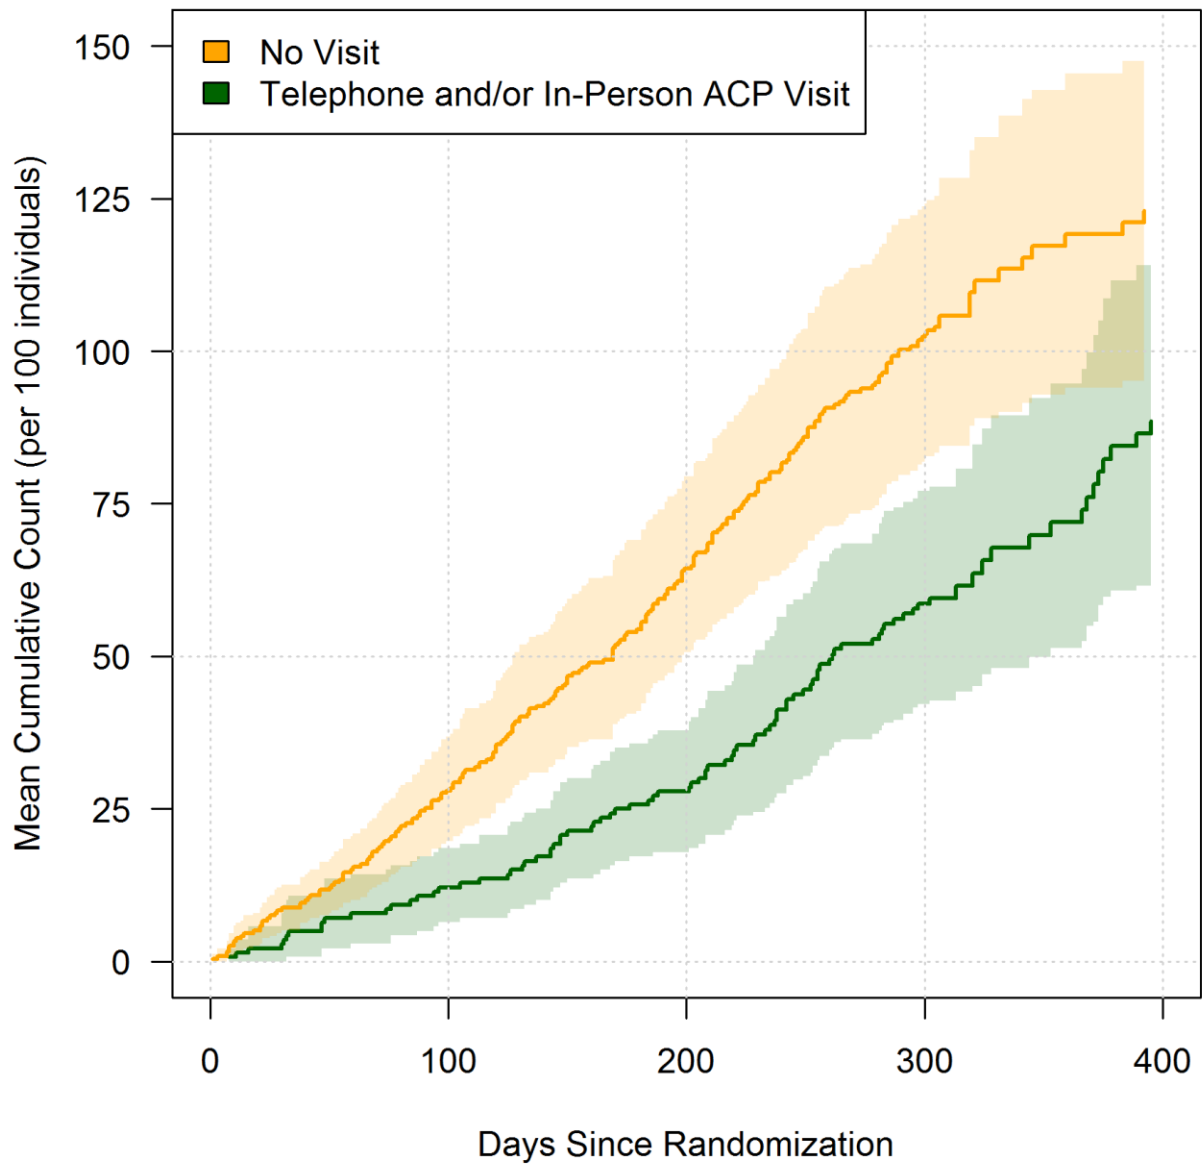

Supplement: jamainternmed-e205950-s002.pdf [file jamainternmed-e205950-s002.pdf]
