# Supplementary material
Source: PubMed Central journal article supplement (PMC7802005)
Supplement: jamainternmed-e205950-s003.pdf [file jamainternmed-e205950-s003.pdf]

# Data Sharing Statement

Gabbard. Effectiveness of a Nurse-Led Multidisciplinary Intervention vs Usual Care on Advance Care Planning for Vulnerable Older Adults in an Accountable Care Organization. *JAMA Intern Med*. Published January 11, 2021. doi:10.1001/jamainternmed.2020.5950

## Data

**Data available:** Yes

**Data types:** Deidentified participant data

**How to access data:** De-identified data will be made available upon email request to the study principal

investigator([jgabbard@wakehealth.edu](mailto:jgabbard@wakehealth.edu)) and upon completion of a data-sharing agreement. The data-sharing agreement will require that the data be used only for research purposes, that no attempts will be made to identify individual participants, that the data will be kept secure, that the user will not distribute the data to other researchers, that the user will return the files or destroy them once the project is completed, and that the user will acknowledge the data source.

**When available:** With publication

## Supporting Documents

**Document types:** None

## Additional Information

**Who can access the data:** De-identified data will be made available upon email request to the study principal

investigator([jgabbard@wakehealth.edu](mailto:jgabbard@wakehealth.edu)) and upon completion of a data-sharing agreement. The data-sharing agreement will require that the data be used only for research purposes, that no attempts will be made to identify individual participants, that the data will be kept secure, that the user will not distribute the data to other researchers, that the user will return the files or destroy them once the project is completed, and that the user will acknowledge the data source.

**Types of analyses:** only for research purposes,

**Mechanisms of data availability:** upon email request to the study principal investigator and upon completion of a data-sharing agreement.
